# Supplementary material for: NR4A family members regulate T cell tolerance to preserve immune homeostasis and suppress autoimmunity
Source: PubMed Central journal article supplement (PMC8492309; doi:10.1172/jci.insight.151005), 2021-09-08
Supplement: jciinsight-6-151005-s292.pdf [file jciinsight-6-151005-s292.pdf]

**Antibodies for surface markers:**

| Antibody                                     | Clone       | Vendor            | Catalog number |
|----------------------------------------------|-------------|-------------------|----------------|
| Rat Anti-Mouse CD45R (B220) Pacific Blue     | RA3-6B2     | BD Pharmingen     | 558108         |
| Rat Anti-Mouse CD45R (B220) Pacific Blue     | RA3-6B2     | Tonbo Biosciences | 65-0452-U100   |
| Rat Anti-Mouse CD3e PE                       | 145-2C11    | Tonbo Biosciences | 50-0031-U100   |
| Rat Anti-Mouse CD8a PerCPCy5.5               | GK1.5       | Southern Biotech  | 1540-09L       |
| Rat Anti-Mouse CD4 BUV395                    | GK1.5       | BD Pharmingen     | 563790         |
| Rat Anti-Mouse CD8a Pacific Blue             | 53-6.7      | BD Pharmingen     | 558106         |
| Rat Anti-Mouse CD8a PECy7                    | 53-6.7      | Tonbo Biosciences | 60-0081        |
| Rat Anti-Mouse CD8a PerCPCy5.5               | 53-6.7      | Tonbo Biosciences | 65-1886-U100   |
| Rat Anti-Human/Mouse CD11b FITC              | M1/70       | Tonbo Biosciences | 35-0112        |
| Rat Anti-Human/Mouse CD11b PE                | M1/70       | BD biosciences    | 553311         |
| Hamster Anti-/Mouse CD11c PE                 | HL3         | BD biosciences    | 553802         |
| Rat Anti-Mouse CD19 PE                       | 6D5         | BioLegend         | 115508         |
| Rat Anti-Mouse CD21 FITC                     | 7G6         | BD biosciences    | 553818         |
| Rat Anti-Mouse CD23 PECy7                    | B3B4        | eBioscience       | 25-0232-82     |
| Rat Anti-Mouse CD25 APC                      | PC61        | BioLegend         | 102012         |
| Rat Anti-Mouse CD25 PE                       | PC61.5      | Tonbo Biosciences | 50-0251-U100   |
| Rat Anti-Mouse CD44 Pacific Blue             | IM7         | BioLegend         | 103020         |
| Rat Anti-Mouse CD44 BV421                    | IM7         | BD biosciences    | 563970         |
| Mouse Anti-Mouse CD45.1 PerCPCy5.5           | A20         | Tonbo Biosciences | 65-0453-U100   |
| Mouse Anti-Mouse CD45.1 APC                  | A20         | eBioscience       | 17-0453-82     |
| Mouse Anti-Mouse CD45.1 FITC                 | A20         | BD Pharmingen     | 553775         |
| Mouse Anti-Mouse CD45.1 PE                   | A20         | Tonbo Biosciences | 50-0453-U-100  |
| Mouse Anti-Mouse CD45.2 PECy7                | 104         | Tonbo Biosciences | 60-0454-U100   |
| Mouse Anti-Mouse CD45.2 Pacific Blue         | 104         | BioLegend         | 109820         |
| Mouse Anti-Mouse CD45.2 FITC                 | 104         | BD Pharmingen     | 553772         |
| Mouse Anti-Mouse CD45.2 BV737                | 104         | BD biosciences    | 612778         |
| Rat Anti-Mouse CD62L PE                      | MEL-14      | eBioscience       | 12-0621-83     |
| Rat Anti-Mouse CD62L BV711                   | MEL-14      | BioLegend         | 104445         |
| Rat Anti-Mouse CD69 PECy7                    | H1.2F3      | BioLegend         | 104502         |
| Rat Anti-Mouse CD73 BV605                    | TY/11.8     | BioLegend         | 127215         |
| Rat Anti-Mouse CD86 Pacific Blue             | GL-1        | BioLegend         | 105022         |
| Rat Anti-Mouse CD93 (AA4.1)                  | AA4.1       | eBioscience       | 17-5892-82     |
| Rat Anti-Mouse CD138 PE                      | 281-2       | BioLegend         | 142504         |
| Hamster Anti-Mouse CD95 (Fas) PECy7          | Jo2         | BD Pharmingen     | 557653         |
| Rat Anti-Mouse CD185 (CXCR5) BV605           | L138D7      | BioLegend         | 145513         |
| Rat Anti-Mouse FR4 (Folate Receptor 4) PECy7 | 12A5        | BioLegend         | 125012         |
| Hamster Anti-Mouse $\gamma\delta$ TCR PE     | GL3         | BD Biosciences    | 553178         |
| Rat Anti-Mouse GL7 PerCPCy5.5                | GL7         | BioLegend         | 144610         |
| Rat Anti-Mouse Ly-6g (Gr1) PE                | 1A8         | BD Biosciences    | 551461         |
| Rat Anti-Mouse IgD APC-eFluor 780            | 11-26c      | eBioscience       | 47-5993-82     |
| Rat Anti-Mouse MHC Class II APC              | M5/114.15.2 | Tonbo Biosciences | 20-5321-U100   |
| Rat Anti-Mouse NK-1.1 PE                     | PK136       | BD Biosciences    | 553165         |
| Rat Anti-Mouse CD279 (PD-1) PCPCy5.5         | 29F.1A12    | BioLegend         | 135208         |
| Rat Anti-Mouse CD49b (pan NK cell marker) PE | DX5         | BD Biosciences    | 553858         |

### ***Antibodies for intra-cellular staining***

| Antibody                                            | Clone      | Vendor                              | Catalog number |
|-----------------------------------------------------|------------|-------------------------------------|----------------|
| Rat Anti-Mouse Foxp3 APC                            | FJK-16s    | eBioscience                         | 17-5773-82     |
| Rat Anti-Mouse Foxp3 FITC                           | FJK-16s    | eBioscience                         | 11-5773-82     |
| Rabbit Anti-active Caspase-3 Alexa Fluor 647        | C92-605    | BD Biosciences                      | 560626         |
| Mouse Anti-Mouse NUR77 PE                           | 12.14      | eBioscience                         | 12-5965-80     |
| Rat Anti-Mouse IL-2 PE                              | JES6-5H4   | eBioscience                         | 12-7021-41     |
| Rabbit Phospho-p44/42 MAPK (T202/Y204) unconjugated | 197G2      | Cell Signaling                      | 4377S/4377L    |
| Goat Anti-Rabbit IgG (H+L) APC                      | Polyclonal | Jackson ImmunoResearch Laboratories | 111-005-144    |

### ***Stimulatory Antibodies***

| Antibody                                        | Clone      | Vendor                              | Catalog number |
|-------------------------------------------------|------------|-------------------------------------|----------------|
| Purified anti-mouse CD3 $\epsilon$ Antibody     | 2c11       | BioLegend                           | 100340         |
| Purified anti-mouse CD28 Antibody               | 37.51      | BioLegend                           | 102102         |
| AffiniPure Goat Anti-Armenian Hamster IgG (H+L) | Polyclonal | Jackson ImmunoResearch Laboratories | 127-005-099    |

### ***Secondary Antibody for the detection of anti-nuclear antibody***

| Antibody                         | Clone      | Vendor                              | Catalog number |
|----------------------------------|------------|-------------------------------------|----------------|
| FITC Donkey Anti-Mouse IgG (H+L) | Polyclonal | Jackson ImmunoResearch Laboratories | 715-095-150    |
